# Supplementary material for: Depletion of γ-glutamylcyclotransferase inhibits breast cancer cell growth via cellular senescence induction mediated by CDK inhibitor upregulation
Source: PubMed Central journal article supplement (PMC5034417; doi:10.1186/s12885-016-2779-y), 2016-09-22

# Supplementary Figure 1

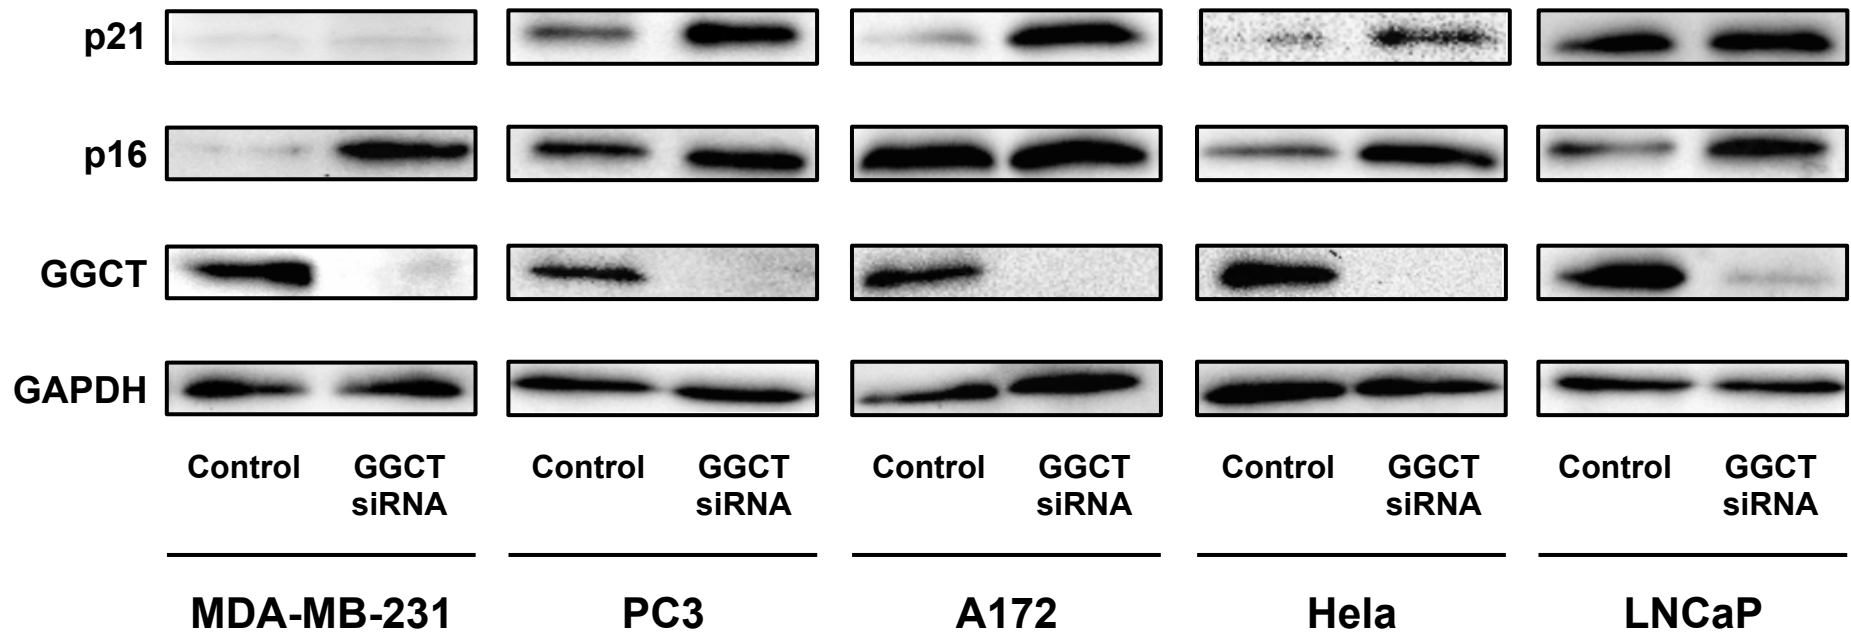

Supplement: 12885_2016_2779_MOESM2_ESM.pdf [file 12885_2016_2779_MOESM2_ESM.pdf]
